# Supplementary material for: Personal Passive Air Samplers for Chlorinated Gases Generated from the Use of Consumer Products
Source: MDPI journal article supplement (doi:10.3390/ijerph18178940), 2021-08-25
Supplement: s1 [file s1]

## **Supplementary material**

### Personal passive air samplers for chlorinated gases generated from the use of consumer products

*YEONJEONG HA, YERIM KOO, and JUNG-HWAN KWON\**

Division of Environmental Science and Ecological Engineering, Korea University, 145 Anam-ro, Seongbuk-gu, Seoul 02841, Republic of Korea

**\*Corresponding Author**

Phone: +82 2 3290 3041

E-mail: [junghwankwon@korea.ac.kr](mailto:junghwankwon@korea.ac.kr)

ORCID: 0000-0002-6341-7562

**Table S1.** Raw response of PTR/SRI-MS, observed chlorine isotope ratios, and chlorine concentration at each time point shown in Figure 1

| Time<br>(min)                           | 0                               |                    | 5                  |       | 15                 |       | 30                 |       | 60                 |       | 120                |       |
|-----------------------------------------|---------------------------------|--------------------|--------------------|-------|--------------------|-------|--------------------|-------|--------------------|-------|--------------------|-------|
| m/z                                     | <sup>a</sup> PTR-MS<br>response | <sup>b</sup> ratio | PTR-MS<br>response | ratio |
| 70                                      | 33.6                            | 7.5                | 30.4               | 7.9   | 37.5               | 7.8   | 44.5               | 12.3  | 53.3               | 12.3  | 67.8               | 9.2   |
| 72                                      | 17.8                            | 4.0                | 21.0               | 5.5   | 24.5               | 5.1   | 28.5               | 7.9   | 31.8               | 7.3   | 42.1               | 5.7   |
| 74                                      | 4.5                             | 1.0                | 3.8                | 1.0   | 4.8                | 1.0   | 3.6                | 1.0   | 4.3                | 1.0   | 7.4                | 1.0   |
| <sup>c</sup> Σ                          | 55.9                            | -                  | 55.3               | -     | 66.8               | -     | 76.7               | -     | 89.5               | -     | 117.2              | -     |
| <sup>d</sup> C <sub>Cl2</sub><br>(ppbv) | 552.46                          |                    | 546.06             |       | 660.27             |       | 758.14             |       | 884.57             |       | 1158.42            |       |

<sup>a</sup> Raw response of PTR/SRI-MS measurement at each passive sampler deployment time. The raw responses were calculated by subtracting responses of outside chamber (background level) from inside chamber that contains liquid bleach at the bottom.

<sup>b</sup> Observed chlorine isotope ratios. Chlorine isotope <sup>35</sup>Cl<sup>35</sup>Cl<sup>-</sup>, <sup>37</sup>Cl<sup>35</sup>Cl<sup>-</sup> or <sup>35</sup>Cl<sup>37</sup>Cl<sup>-</sup>, and <sup>37</sup>Cl<sup>37</sup>Cl<sup>-</sup> have m/z values of 70, 72, and 74, respectively. The expected chlorine isotope ratio is m/z 70: 72: 74 = 9:6:1.

<sup>c</sup> Summation of PTR/SRI-MS raw response occurred at m/z=70,72, and 74.

<sup>d</sup> The chlorine concentration was calculated by the calibration curve of PTR/SRI-MS of chlorine gas described in our previous study<sup>1</sup> (PTR/SRI-MS response = 0.1012 × C<sub>Cl2</sub> (chlorine concentration), r<sup>2</sup>=0.9942)

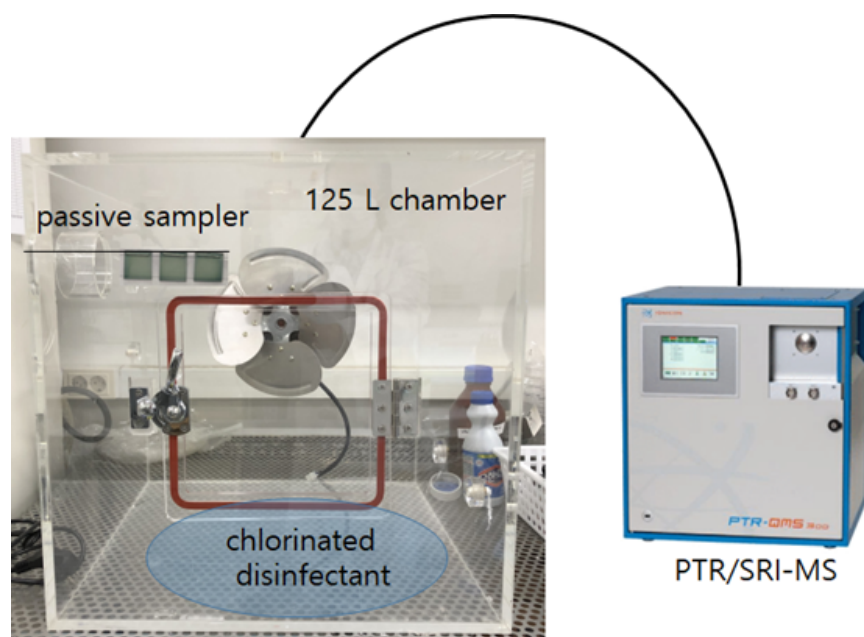

**Figure S1.** Scheme of the chamber design used in this study. Passive sampler patches were hung on the top of the 125 L acrylic chamber and chlorinated disinfectants were spread on the bottom of the chamber. Proton transfer reaction/selective reagent ionization-mass spectrometer (PTR/SRI-MS) was connected on the top of the chamber to measure chlorine concentration.

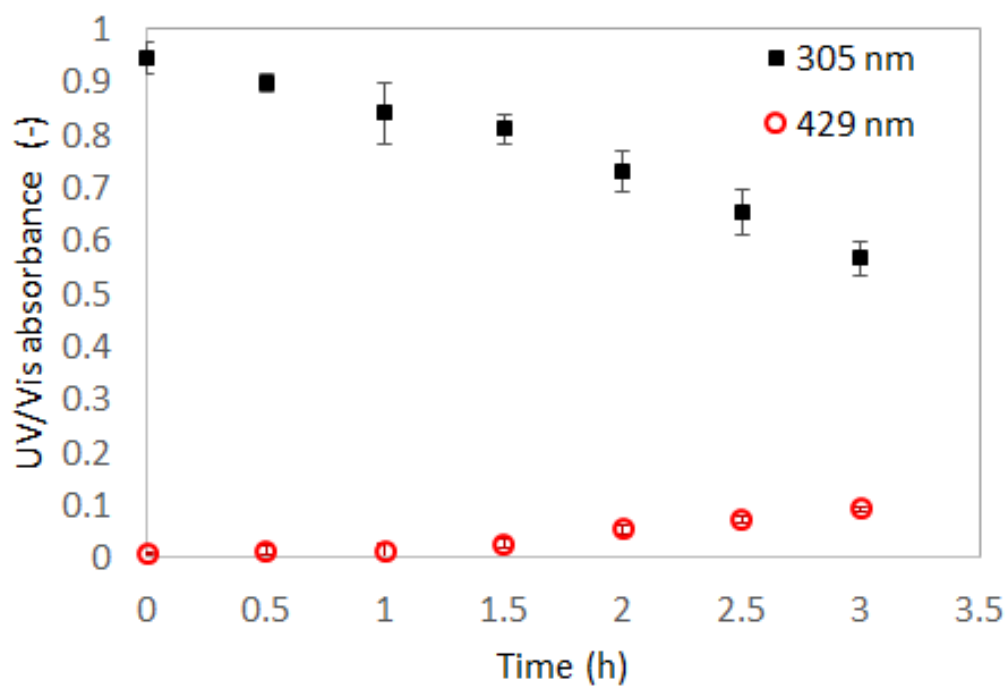

**Figure S2.** UV/Vis absorbance of passive sampler extraction solvent (isopropyl alcohol) at 305 nm (o-dianisidine) and 429 nm (oxidized form of o-dianisidine synthesized by oxidation reaction of o-dianisidine with chlorine) after passive sampler deployment in 125 L chamber with spreading 50.8 g of a gel type of chlorinated disinfectant.

## References

1. Ha, Y., Kim, Y., Song, E., Yoo, H. J. & Kwon, J. H. Development of a personal passive air sampler for estimating exposure to effective chlorine while using chlorine-based disinfectants. *Indoor air* **31**, 557-565 (2021).
